# Supplementary material for: Niobium-substituted octahedral molecular sieve (OMS-2) materials in selective oxidation of methanol to dimethoxymethane
Source: Royal Society of Chemistry journal article supplement (doi:10.1039/c9ra04804a), 2019-01-01
Supplement: c9ra04804a1.pdf [file c9ra04804a1.pdf]

## Supporting Information

### **Niobium-substituted Octahedral Molecular Sieve (OMS-2) Materials in Selective Oxidation of Methanol to Dimethoxymethane**

Niluka D. Wasalathanthri,<sup>1</sup> Curtis Guild,<sup>1</sup> Quddus A. Nizami,<sup>3</sup> Shanka L. Dissanayake<sup>1</sup>, Junkai He,<sup>2</sup> Peter Kerns,<sup>1</sup> Jared Fee,<sup>1</sup> Laura Achola,<sup>1</sup> Dinithi Rathnayake,<sup>1</sup> Chandima Weerakkody,<sup>1</sup> Steven L. Suib,<sup>1-2,\*</sup> and Partha Nandi<sup>3,\*</sup>

<sup>1</sup> *Department of Chemistry, University of Connecticut, Storrs, Connecticut 06269, United States*

<sup>2</sup> *Institute of Material Science, University of Connecticut, Storrs, Connecticut 06269, United States*

<sup>3</sup> *Corporate Strategic Research, ExxonMobil Research and Engineering Company, Annandale, New Jersey 08801, United States*

| Table of Contents:                                                  | Page No. |
|---------------------------------------------------------------------|----------|
| Figure 1S: In situ XRD of Nb-OMS-2                                  | 2        |
| Table 1S: BET Surface area as a function of calcination temperature | 2        |
| Figure 2S: BJH pore size distribution                               | 3        |
| Table 2S: Comparison of pore volumes and pore diameters             | 3        |
| Table 3S: XPS data of Nb-OMS-2 materials                            | 4        |

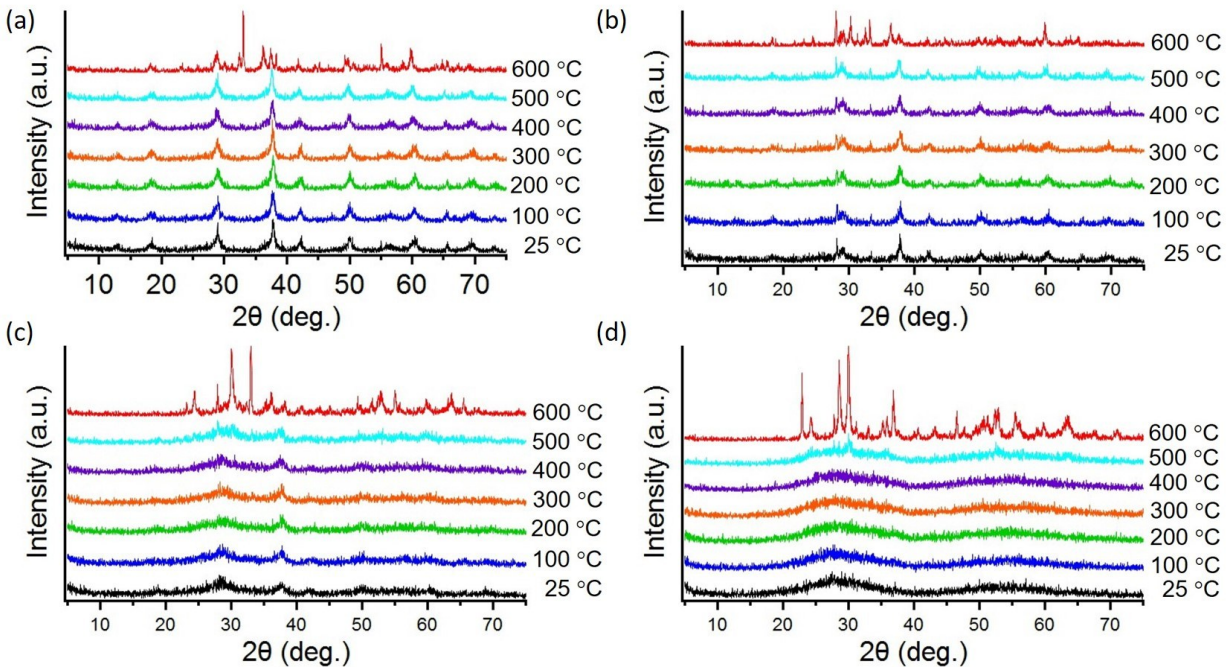

**Figure 1S:** *In situ* XRD of Nb-OMS-2 heated on an environmental cell under air: (a) 15% Nb-OMS-2 (b) 21% Nb-OMS-2 (c) 31% Nb-OMS-2 (d) 68% Nb-OMS-2

**Table 1S:** BET Surface area as a function of calcination temperature.

| Calcination Temperature (°C) | K-OMS-2 Surface Area (m <sup>2</sup> /g) | Nb:Mn (0.15) Surface Area (m <sup>2</sup> /g) | Nb:Mn (0.21) Surface Area (m <sup>2</sup> /g) | Nb:Mn (0.31) Surface Area (m <sup>2</sup> /g) | Nb:Mn (0.68) Surface Area (m <sup>2</sup> /g) |
|------------------------------|------------------------------------------|-----------------------------------------------|-----------------------------------------------|-----------------------------------------------|-----------------------------------------------|
| As synthesized               | 269                                      | 147                                           | 131                                           | 184                                           | 339                                           |
| 300                          | 173                                      | 120                                           | 98                                            | 178                                           | 266                                           |
| 350                          | 94                                       | 124                                           | 90                                            | 159                                           | 237                                           |
| 400                          | 55                                       | 109                                           | 80                                            | 123                                           | 178                                           |
| 600                          | 0.6                                      | 3                                             | 13                                            | 18                                            | 22                                            |

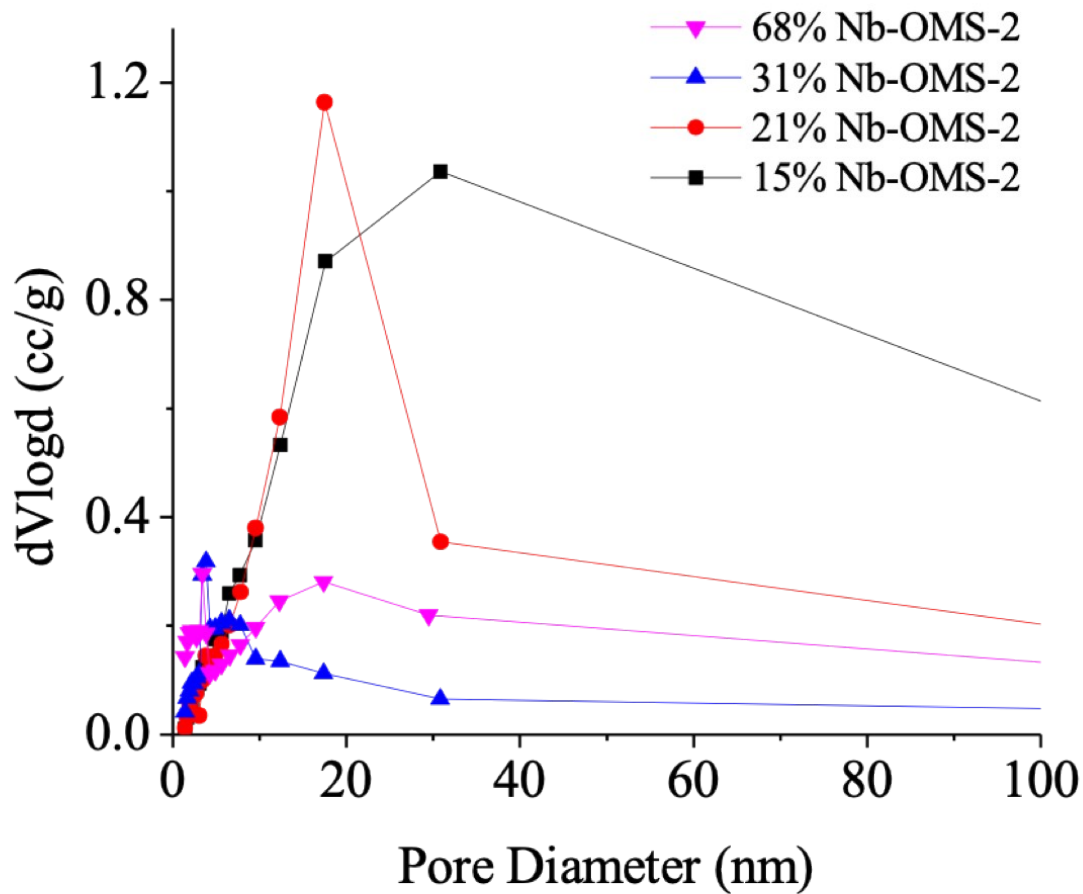

**Figure 2S:** BJH pore size distribution.

**Table 2S:** Comparison of pore volumes and pore diameters calculated using BJH method and QSDFT method.

| Mol% Nb loading | BJH Method         |                    | QSDFT Method       |                    |
|-----------------|--------------------|--------------------|--------------------|--------------------|
|                 | Pore Volume (cc/g) | Pore Diameter (nm) | Pore Volume (cc/g) | Pore Diameter (nm) |
| 15              | 0.674              | 17.6               | 0.536              | 29.0               |
| 21              | 0.518              | 17.5               | 0.457              | 29.0               |
| 31              | 0.216              | 3.4                | 0.182              | 1.3                |
| 68              | 0.344              | 1.6                | 0.285              | 1.0                |

**Table 3S:** XPS data of Nb-OMS-2 materials.

| Mol% Nb loading | Mn <sup>2p3/2</sup> | Mn <sup>2p1/2</sup> | Nb <sup>3d5/2</sup> | Nb <sup>3d3/2</sup> |
|-----------------|---------------------|---------------------|---------------------|---------------------|
| 15              | 641.9               | 653.7               | 207.9               | 210.6               |
| 21              | 642.2               | 653.9               | 207.9               | 209.7               |
| 31              | 643.1               | 654.7               | 209.1               | 211.8               |
| 68              | 642.9               | 654.9               | 209.0               | 211.8               |
